# Supplementary material for: Nucleophilic aromatic substitution using Et3SiH/cat. t-Bu-P4 as a system for nucleophile activation
Source: Royal Society of Chemistry journal article supplement (doi:10.1039/b700140a), 2007-01-01
Supplement: b700140a.pdf [file b700140a.pdf]

# Supplementary Material (ESI) for Chemical Communications  
# This journal is (c) The Royal Society of Chemistry 2007

**Nucleophilic Aromatic Substitution Using Et<sub>3</sub>SiH/ cat. *t*-Bu-P4 as a System for Nucleophile  
Activation**

**Masahiro Ueno, Misato Yonemoto, Masahiro Hashimoto, Andrew E. H. Wheatley, Hiroshi  
Naka and Yoshinori Kondo**

**General comment**

<sup>1</sup>H-NMR spectra were recorded on a JEOL AL-400 using tetramethylsilane as an internal standard. Chemical shifts are expressed in δ(ppm) values, and coupling constants are expressed in hertz (Hz). The following abbreviations are used: s = singlet, d = doublet, m = multiplet, t = triplet, brs = broad

singlet, dd = double-doublet, dt = double-triplet and ddd = double-doublet-doublet. Mass spectra were recorded on JEOL JMS-DX303 or JEOL JMS-AX500 spectrometer. IR spectra were measured with SensIR ATR FT-IR. All the reactions dealing with air or moisture sensitive compounds were carried out in a dry reaction vessel under argon atmosphere unless otherwise noted. Flash column chromatography was carried out using Kanto Chemical Silica gel 60N (70-230 mesh). Triethylsilane was purchased from ACROS. Dry DMSO and dry DMF were purchased from Kanto Chemical Company and used as supplied. *tert*-Butyl P4 base 1.0 M solution in *n*-hexane was purchased from Fulka Chemie and used as supplied.

#### **General procedure for the S<sub>N</sub>Ar reaction of alcohols using Et<sub>3</sub>SiH/cat. *t*-Bu-P4**

A mixture of aryl fluoride (0.50 mmol), alcohol (1.20 mmol), triethylsilane (120 mg, 1.03 mmol) and dry DMSO (1 mL) was placed in a 20-mL flask equipped with a magnetic stirring bar under argon atmosphere. *t*-Bu-P4 base, 1.0 M solution in *n*-hexane (50 mL, 0.05 mmol) was added to the solution. The reaction mixture was stirred for 2 h at 100 °C. The mixture was quenched with MeOH (2.0 mL) and stirred for several hours (Table 1). Brine was added to the solution and extracted with AcOEt. The combined organic extracts were dried over MgSO<sub>4</sub>, filtrated, and concentrated under reduced pressure. The crude product was purified with SiO<sub>2</sub> column chromatography.

#### **1-Hexyloxy-2-nitrobenzene**

Yield: 100 %, yellow oil.

<sup>1</sup>H-NMR(CDCl<sub>3</sub>)δ(ppm): 0.90 (t, 3 H, *J* = 7.4 Hz), 1.31-1.36 (m, 4 H), 1.44-1.56 (m, 2 H), 1.83 (td, 2 H, *J* = 6.8 Hz, 7.4 Hz), 4.09 (t, 2 H, *J* = 6.8 Hz), 6.99 (dt, 1 H, *J* = 1.0 Hz, 7.8 Hz), 7.05 (dd, 1 H, *J* = 1.0 Hz, 7.8 Hz), 7.49 (dt, 1 H, *J* = 1.6 Hz, 7.8 Hz), 7.8 Hz (dd, 1 H, *J* = 1.6 Hz, 7.8 Hz); IR(neat) 2929, 1607, 1351, 1277, 1254, 1005 cm<sup>-1</sup>; LRMS(EI) *m/z*: 223 (M<sup>+</sup>) HRMS: calcd for C<sub>12</sub>H<sub>17</sub>NO<sub>3</sub> 223.1208, found 223.1190.

#### **1-Butoxy-2-nitrobenzene**

Yield: 97 %, yellow oil.

<sup>1</sup>H-NMR(CDCl<sub>3</sub>)δ(ppm): 0.97 (t, 3 H, *J* = 7.5 Hz), 1.46-1.59 (m, 2 H), 1.78-1.87 (m, 2 H), 4.11 (t, 2 H, *J* = 6.5 Hz), 7.00 (t, 1 H, *J* = 8.0 Hz), 7.07 (d, 1 H, *J* = 8.0 Hz), 7.51 (dt, 1 H, *J* = 1.9 Hz, 8.0 Hz), 7.82 (dd, 1 H, *J* = 1.9 Hz, 8.0 Hz); IR(neat) 2960, 1607, 1522, 1351, 1279, 1254, 1165 cm<sup>-1</sup>; MS(EI) *m/z*: 243 (M<sup>+</sup>); HRMS calcd for C<sub>10</sub>H<sub>13</sub>NO<sub>3</sub> 195.0895, found 195.0878.

#### **1-Nitro-2-(1-phenylethoxy)benzene**

Yield: 92 %, yellow oil.

$^1\text{H-NMR}(\text{CDCl}_3)\delta(\text{ppm})$ : 1.68 (d, 3 H,  $J = 6.6$  Hz), 5.45 (q, 1 H,  $J = 6.6$  Hz), 6.90 (d, 1 H,  $J = 8.1$  Hz), 6.94 (t, 1 H,  $J = 8.1$  Hz), 7.23-7.42 (m, 6 H), 7.77 (dd, 1 H,  $J = 1.6$  Hz, 8.1 Hz)

IR(neat) 2981, 1605, 1520, 1449, 1351, 1275, 1252, 1065, 853  $\text{cm}^{-1}$ ; MS(EI)  $m/z$ : 243 ( $\text{M}^+$ ); HRMS calcd for  $\text{C}_{14}\text{H}_{13}\text{NO}_3$  243.0895, found 243.0911.

#### **1-sec-Butoxy-2-nitrobenzene**

Yield: 71 %, yellow oil.

$^1\text{H-NMR}(\text{CDCl}_3)\delta(\text{ppm})$ : 1.00 (t, 3 H,  $J = 7.5$  Hz), 1.35 (d, 3 H,  $J = 6.0$  Hz), 1.62-1.88 (m, 2 H), 4.45 (sext, 1 H,  $J = 6.0$  Hz), 6.98 (t, 1 H,  $J = 8.1$  Hz), 7.06 (d, 1 H,  $J = 8.1$  Hz), 7.48 (dt, 1 H,  $J = 1.5$  Hz, 8.1 Hz), 7.77 (dd, 1 H,  $J = 1.5$  Hz, 8.1 Hz); IR(neat) 2975, 1605, 1522, 1351, 1277, 1252, 922, 854  $\text{cm}^{-1}$ ; MS(EI)  $m/z$ : 243 ( $\text{M}^+$ ); HRMS calcd for  $\text{C}_{10}\text{H}_{13}\text{NO}_3$  195.0895, found 195.0883.

#### **4-Butoxybenzotrile**

Yield: 98 %, colorless oil.

$^1\text{H-NMR}(\text{CDCl}_3)\delta(\text{ppm})$ : 0.98 (t, 3 H,  $J = 7.1$  Hz), 1.49 (sext, 2 H,  $J = 7.1$  Hz), 1.75-1.82 (m, 2 H), 4.00 (t, 2 H,  $J = 7.1$  Hz), 6.93 (d, 2 H,  $J = 9.2$  Hz), 7.57 (d, 2 H,  $J = 9.2$  Hz); IR(neat) 2958, 2223, 1605, 1507, 1256, 1171, 834  $\text{cm}^{-1}$ ; MS(EI)  $m/z$ : 175 ( $\text{M}^+$ ), HRMS calcd for  $\text{C}_{11}\text{H}_{13}\text{NO}$  175.0997, found 175.0991

#### **1-Butoxy-4-(trifluoromethyl)benzene**

Yield: 58 %, colorless oil.

$^1\text{H-NMR}(\text{CDCl}_3)\delta(\text{ppm})$ : 0.92 (t, 3 H,  $J = 7.6$  Hz), 1.45-1.54 (m, 2 H), 1.74-1.82 (m, 2 H), 3.99 (t, 2 H,  $J = 6.6$  Hz), 6.94 (d, 2 H, 8.8 Hz), 7.52 (d, 2 H,  $J = 8.8$  Hz)

IR(neat) 2937, 1617, 1520, 1328, 1256, 1119, 1067, 1009, 836  $\text{cm}^{-1}$

MS(EI)  $m/z$ : 218 ( $\text{M}^+$ ). HRMS: calcd. for  $\text{C}_{11}\text{H}_{13}\text{F}_3\text{O}$  218.0918, found 218.0900

#### **2-(4-Methoxyphenoxy)nitrobenzene**

Yield: 76 %, yellow crystal

m.p. 73-75°C;  $^1\text{H-NMR}(\text{CDCl}_3)\delta(\text{ppm})$ : 3.81 (s, 3 H), 6.88-6.93 (m, 3 H), 7.02 (d, 2H,  $J = 9.3$  Hz), 7.09-7.15 (m, 1 H), 7.44 (ddd, 1 H,  $J = 1.7$  Hz,  $J = 7.5$  Hz,  $J = 8.3$  Hz), 7.91 (dd, 1 H,  $J = 1.7$  Hz,  $J = 8.3$  Hz); IR (crystal) 3;101, 3012, 2840, 1600, 1497, 1345, 1229  $\text{cm}^{-1}$ ; MS(EI)  $m/z$ : 245 ( $\text{M}^+$ ); HRMS calcd for  $\text{C}_{13}\text{H}_{11}\text{NO}_4$  245.0688, found 245.0688.

#### **General procedure for silylation of alcohols using $\text{Et}_3\text{SiH}/\text{cat. } t\text{-Bu-P4}$**

A mixture of an alcohol (2 mmol), triethylsilane (2.4 mmol), DMF (2 mL),  $t\text{-Bu-P4}$  base 1.0  $M$  solution in  $n\text{-hexane}$  (0.02 mmol) was stirred using the conditions listed in Table 2. The mixture

was treated with saturated aq.  $\text{NH}_4\text{Cl}$  and  $\text{H}_2\text{O}$  and the mixture was extracted with AcOEt. The extract was washed with brine and dried over  $\text{MgSO}_4$ . The solvent was removed under reduced pressure and afforded the crude product, which was purified by  $\text{SiO}_2$  column chromatography using n-hexane-AcOEt as an eluent. The silyl ethers were obtained as colorless oils or white solids.

#### **Triethylnon-8-enyloxysilane**

Colorless oil 500mg (98%)

$^1\text{H-NMR}$  (400MHz,  $\text{CDCl}_3$ ) $\delta$ (ppm): 0.60 (q,  $J = 8.0$  Hz, 6 H), 0.96 (t,  $J = 8.0$  Hz, 9 H), 1.30-1.33 (m, 8 H), 1.49-1.56 (m, 2 H), 2.04 (dt,  $J = 6.4, 8.0$  Hz, 2 H), 3.59 (t,  $J = 6.4$  Hz, 2 H), 4.92 (ddt,  $J = 1.6, 2.0, 10.4$  Hz, 1 H), 4.99 (dq,  $J = 1.6, 17.2$  Hz, 1 H), 5.81 (ddt,  $J = 6.4, 10.4, 17.2$  Hz, 1 H)

IR(neat) 2927, 2346, 1640, 1459, 1414, 1239, 1098, 1005, 909, 745

LRMS (EI) m/z 227 ( $\text{M}-29$ )<sup>+</sup>

HRMS calcd for  $\text{C}_{13}\text{H}_{27}\text{O Si}$  227.1830, found 227.1826.

#### **Benzyloxytriethylsilane**

Colorless oil 423 mg (95%)

$^1\text{H-NMR}$  (400MHz,  $\text{CDCl}_3$ ) $\delta$ (ppm): 0.65 (q,  $J = 7.6$  Hz, 6 H), 0.98 (t,  $J = 7.6$  Hz, 9 H), 4.73 (s, 2 H), 7.25 (m, 1 H), 7.32-7.33 (m, 4 H)

IR(neat) 2954, 2875, 2360, 2117, 1740, 1495, 1455, 1414, 1376, 1239, 1206, 1096, 1069, 1007, 810, 799, 731, 697

LRMS (EI) m/z 222 ( $\text{M}^+$ )

HRMS calcd for  $\text{C}_{13}\text{H}_{22}\text{OSi}$  222.1440, found 222.1455.

#### **Triethyl(1-phenylethoxy)silane**

Colorless oil 458 mg (97%)

$^1\text{H-NMR}$  (400MHz,  $\text{CDCl}_3$ ) $\delta$ (ppm): 0.57 (m, 6 H), 0.91 (t,  $J = 8.0$  Hz, 9 H), 1.42 (d,  $J = 6.4$  Hz, 3 H), 4.86 (q,  $J = 6.4$  Hz, 1 H), 7.21 (m, 1 H), 7.23-7.35 (m, 4 H)

IR(neat) 2954, 2875, 2362, 2115, 1492, 1455, 1414, 1358, 1239, 1206, 1094, 1034, 955, 793, 743, 699

LRMS (EI) m/z 236 ( $\text{M}^+$ )

HRMS calcd for  $\text{C}_{14}\text{H}_{24}\text{OSi}$  236.1596, found 236.1601.

#### **Triethyl(1-propylheptyloxy)silane**

Colorless oil 534 mg (98%)

$^1\text{H-NMR}$  (400MHz,  $\text{CDCl}_3$ ) $\delta$ (ppm): 0.59 (q,  $J = 8.0$  Hz, 6 H), 0.88 (t,  $J = 6.8$  Hz, 3 H), 0.90 (t,  $J = 6.8$  Hz, 3 H), 0.96 (t,  $J = 8.0$  Hz, 9 H), 1.27 (brs, 10 H), 1.40-1.41 (m, 4 H), 3.63 (quint,  $J = 6.0$  Hz, 1 H)

IR(neat) 2956, 2931, 2875, 1459, 1378, 1237, 1125, 1071, 1040, 1005, 724

LRMS (EI)  $m/z$  243 (M-29)<sup>+</sup>

HRMS calcd for C<sub>14</sub>H<sub>31</sub>OSi 243.2143, found 243.2153.

#### **Triethyl(1-methyl-1-phenylethoxy)silane**

Colorless oil 476 mg (95%)

<sup>1</sup>H-NMR (400MHz, CDCl<sub>3</sub>) $\delta$ (ppm): 0.59 (q,  $J$ = 8.0 Hz, 6 H), 0.94 (t,  $J$ = 8.0 Hz, 9 H), 1.57 (s, 6 H), 7.19 (tt,  $J$ =1.6, 7.6 Hz, 1 H), 7.30 (t,  $J$ = 7.6 Hz, 2 H), 7.46 (dd,  $J$ = 1.6, 7.6 Hz, 2 H)

IR(neat) 2954, 2875, 2362, 2117, 1737, 1493, 1459, 1380, 1258, 1173, 1040, 741, 699

LRMS (EI)  $m/z$  221 (M-29)<sup>+</sup>

HRMS calcd for C<sub>13</sub>H<sub>21</sub>OSi 221.1361, found 221.1350.

#### **Triethyltrityloxysilane**

White solid 653 mg (87%)

<sup>1</sup>H-NMR (400MHz, CDCl<sub>3</sub>) $\delta$ (ppm): 0.29 (q,  $J$ = 8.0 Hz, 6 H), 0.83 (t,  $J$ = 8.0 Hz, 9H), 7.20-7.29 (m, 9 H), 7.41-7.44 (m, 6 H)

IR(neat) 2954, 2904, 2871, 1488, 1445, 1241, 1158, 1088, 1061, 1001, 905, 851, 741, 724, 695, 673

LRMS (EI)  $m/z$  374 (M<sup>+</sup>)

HRMS calcd for C<sub>24</sub>H<sub>22</sub>O<sub>3</sub>Si 374.2066, found 374.2048.

#### **General procedure for the S<sub>N</sub>Ar reaction of C-nucleophiles using Et<sub>3</sub>SiH/cat. *t*-Bu-P4**

A mixture of aryl fluoride (0.50 mmol), C-nucleophiles (0.75 mmol), triethylsilane (87 mg, 0.75 mmol) and dry DMF (0.5 mL) was placed in a 10-mL flask equipped with a magnetic stirring bar under argon atmosphere. *t*-Bu-P4 base, 1.0 M solution in *n*-hexane (50  $\mu$ L, 0.05 mmol) was added to the solution. The reaction mixture was stirred for 1-24 h at 80 °C. The mixture was treated with saturated aq. NH<sub>4</sub>Cl and H<sub>2</sub>O and the mixture was extracted with AcOEt. The extract was washed with brine and dried over MgSO<sub>4</sub>. The solvent was removed under reduced pressure and afforded the crude product, which was purified by SiO<sub>2</sub> column chromatography using *n*-hexane-AcOEt as an eluent.

#### **Diethyl methyl(2-nitrophenyl)malonate**

Yellow oil 146 mg (99%)

<sup>1</sup>H-NMR (400MHz, CDCl<sub>3</sub>) $\delta$ (ppm): 1.23 (t,  $J$ = 7.2 Hz, 6 H), 1.56 (s, 3H), 4.15-4.30 (m, 4H), 7.33 (dd,  $J$ = 1.2 Hz, 8.0 Hz, 1H), 7.48 (dt,  $J$ = 1.2 Hz, 8.0 Hz, 1H), 7.59 (dt,  $J$ = 1.2 Hz, 8.0 Hz, 1H), 8.02 (dd,  $J$ = 1.2 Hz, 8.0 Hz, 1H)

IR(neat) 2983, 1746, 1528, 1355, 1260, 1204, 1106, 1015, 856, 748

LRMS (EI) m/z 296 (M+1)<sup>+</sup>

HRMS calcd for C<sub>14</sub>H<sub>18</sub>NO<sub>6</sub> 296.1134, found 296.1122.

#### **Diethyl 2-nitrophenylmalonate**

Colorless oil 79 mg (56%)

<sup>1</sup>H-NMR (400MHz, CDCl<sub>3</sub>)δ(ppm): 1.29 (t, *J*= 7.1 Hz, 6 H), 4.27 (q, *J*= 7.1 Hz, 4H), 5.30 (s, 1H), 7.48-7.58 (m, 2H), 7.66 (t, *J*= 7.3 Hz, 1H), 8.08 (d, *J*= 7.3 Hz, 1H)

IR(neat) 2983, 1748, 1530, 1349, 1223, 1030, 856, 787

LRMS (EI) m/z 282 (M+1)<sup>+</sup>

HRMS calcd for C<sub>13</sub>H<sub>16</sub>NO<sub>6</sub> 282.0978, found 282.0939.

#### **Diethyl *n*-hexyl(2-nitrophenyl)malonate**

Orange oil 139 mg (76%)

<sup>1</sup>H-NMR (400MHz, CDCl<sub>3</sub>)δ(ppm): 0.86 (t, *J*= 6.8Hz, 3H), 1.19-1.55 (m, 14H), 2.44-2.49 (m, 2H), 7.34 (dd, *J*= 1.2 Hz, 7.8 Hz, 1H), 7.47 (dt, *J*= 1.2 Hz, 7.8 Hz, 1H), 7.60 (dt, *J*= 1.5 Hz, 7.8 Hz, 1H), 8.01 (dd, *J*= 1.5 Hz, 7.8 Hz, 1H)

<sup>13</sup>C-NMR (100MHz, CDCl<sub>3</sub>)δ(ppm): 13.69, 13.83, 22.40, 25.37, 29.33, 31.31, 35.41, 61.82, 62.75, 125.53, 128.26, 130.35, 132.41 (2C), 149.47, 169.10

IR(neat) 2931, 1748, 1735, 1530, 1355, 1246, 1196, 1023, 857, 714

LRMS (EI) m/z 365 (M)<sup>+</sup>

HRMS calcd for C<sub>19</sub>H<sub>27</sub>NO<sub>6</sub> 365.1838, found 365.1869.

#### **Diethyl 2-nitrophenyl(2-propenyl)malonate**

Yellow oil 152 mg (95%)

<sup>1</sup>H-NMR (400MHz, CDCl<sub>3</sub>)δ(ppm): 1.22 (t, *J*= 7.2 Hz, 6 H), 3.27 (dt, *J*= 1.6 Hz, 7.2 Hz, 2H), 4.17-4.28 (m, 4H), 4.98 (d, *J*= 10.4 Hz, 1H), 5.00 (dd, *J*= 1.2 Hz, 17.6 Hz, 1H), 5.70-5.81 (m, 1H), 7.32 (dd, *J*= 1.2 Hz, 8.0 Hz, 1H), 7.46 (dt, *J*= 1.2 Hz, 8.0 Hz, 1H), 7.57 (dt, *J*= 1.2 Hz, 8.0 Hz, 1H), 8.01 (dd, *J*= 1.2 Hz, 8.0 Hz, 1H)

<sup>13</sup>C-NMR (100MHz, CDCl<sub>3</sub>)δ(ppm): 13.86, 39.75, 62.15, 63.07, 119.01, 125.60, 128.39, 130.87, 132.01, 132.35, 133.01, 149.17, 168.62

IR(neat) 2983, 1733, 1530, 1356, 1241, 1202, 1027, 857, 717

LRMS (EI) m/z 322 (M+1)<sup>+</sup>

HRMS calcd for C<sub>16</sub>H<sub>20</sub>NO<sub>6</sub> 322.1291, found 322.1286.

#### **Ethyl 2-cyano-2-(2-nitrophenyl)-4-pentenoate**

Yellow oil 122 mg (89%)

$^1\text{H-NMR}$  (400MHz,  $\text{CDCl}_3$ ) $\delta$ (ppm): 1.30 (t,  $J= 7.3$  Hz, 3 H), 3.19 (dd,  $J= 7.3$  Hz, 14.4 Hz, 1H), 3.32 (dd,  $J= 7.3$  Hz, 14.4 Hz, 1H), 4.29 (q,  $J= 7.3$  Hz, 2H), 5.18-5.22 (m, 2H), 5.69-5.80 (m, 1H), 7.60 (d,  $J= 7.6$  Hz, 1H), 7.72 (t,  $J= 7.6$  Hz, 1H), 7.79 (d,  $J= 7.6$  Hz, 1H), 8.13 (d,  $J= 7.6$  Hz, 1H)

IR(neat) 3085, 2985, 2248, 1742, 1530, 1351, 1219, 1027, 932, 853, 753, 731

LRMS (EI)  $m/z$  274 (M) $^+$

HRMS calcd for  $\text{C}_{14}\text{H}_{14}\text{N}_2\text{O}_4$  274.0945, found 296.0975.

### **2-Nitrophenyl(2-propenyl)malononitrile**

Orange oil 101 mg (89%)

$^1\text{H-NMR}$  (400MHz,  $\text{CDCl}_3$ ) $\delta$ (ppm): 3.32 (d,  $J= 7.2$  Hz, 2H), 5.44-5.49 (m, 2H), 5.87-5.98 (m, 1H), 7.69 (dt,  $J= 1.6$  Hz, 7.2 Hz, 1H), 7.78 (dt,  $J= 1.6$  Hz, 7.2 Hz, 1H), 7.87 (dd,  $J= 1.6$  Hz, 7.2 Hz, 1H), 8.06 (dd,  $J= 1.6$  Hz, 7.2 Hz, 1H)

$^{13}\text{C-NMR}$  (100MHz,  $\text{CDCl}_3$ ) $\delta$ (ppm): 41.60, 43.64, 112.98, 124.15, 124.28, 126.67, 127.97, 129.66, 131.53, 133.93, 147.86

IR(neat) 2925, 2252, 1739, 1530, 1351, 940, 849, 745, 720

LRMS (EI)  $m/z$  227 (M) $^+$

HRMS calcd for  $\text{C}_{12}\text{H}_9\text{N}_3\text{O}_2$  227.0695, found 227.0675.

### **Diethyl methyl(4-nitrophenyl)malonate**

Yellow oil 143 mg (97%)

$^1\text{H-NMR}$  (400MHz,  $\text{CDCl}_3$ ) $\delta$ (ppm): 1.27 (t,  $J= 6.8$  Hz, 6 H), 1.90 (s, 3H), 4.25 (q,  $J= 6.8$  Hz, 2H), 4.26 (q,  $J= 6.8$  Hz, 2H), 7.57 (d,  $J= 9.2$  Hz, 2H), 8.20 (d,  $J= 9.2$  Hz, 2H)

IR(neat) 2985, 1721, 1520, 1349, 1252, 1208, 1094, 1013, 855, 710

LRMS (EI)  $m/z$  295 (M) $^+$

HRMS calcd for  $\text{C}_{14}\text{H}_{17}\text{NO}_6$  295.1056, found 295.1043.

### **Diethyl methyl(2-cyanophenyl)malonate**

Yellow oil 63 mg (46%)

$^1\text{H-NMR}$  (400MHz,  $\text{CDCl}_3$ ) $\delta$ (ppm): 1.32 (t,  $J= 7.2$  Hz, 6 H), 1.97 (m, 3H), 4.24-4.39 (m, 4H), 7.28 (dd,  $J= 1.2$  Hz, 7.6 Hz, 1H), 7.40 (dt,  $J= 1.2$  Hz, 7.6 Hz, 1H), 7.56 (dt,  $J= 1.6$  Hz, 7.6 Hz, 1H), 7.73 (dd,  $J= 1.6$  Hz, 7.6 Hz, 1H)

$^{13}\text{C-NMR}$  (100MHz,  $\text{CDCl}_3$ ) $\delta$ (ppm): 13.85, 22.74, 59.76, 62.38, 112.96, 117.93, 127.32, 127.66, 132.48, 132.52, 142.26, 169.74

IR(neat) 2985, 2225, 1727, 1258, 1214, 1110, 1015, 859, 760

LRMS (EI)  $m/z$  275 (M) $^+$

HRMS calcd for  $\text{C}_{15}\text{H}_{17}\text{NO}_4$  275.1158, found 275.1174.

# Supplementary Material (ESI) for Chemical Communications  
# This journal is (c) The Royal Society of Chemistry 2007

**Diethyl methyl(4-cyanophenyl)malonate**

Yellow oil 91 mg (66%)

$^1\text{H-NMR}$  (400MHz,  $\text{CDCl}_3$ ) $\delta$ (ppm): 1.26 (t,  $J= 7.1$  Hz, 6H), 1.87 (s, 3H), 4.20-4.30 (m, 4H), 7.50 (d,  $J= 8.4$  Hz, 2H), 7.64 (d,  $J= 8.4$  Hz, 2H)

IR(neat) 2985, 2229, 1727, 1250, 1208, 1094, 1017, 858, 841

LRMS (EI)  $m/z$  275 (M) $^+$

HRMS calcd for  $\text{C}_{15}\text{H}_{17}\text{NO}_4$  275.1158, found 275.1172.
